# Supplementary material
Source: publisher site journal article supplement (https://www.spandidos-publications.com/5542/downloadSupplementary)
Supplement: Supplementary file 1 [file downloadSupplementary]

## Sheet: Sheet1
Table SVIII. The expression of IKZF1, CD3E, SYN1, GRIN2B, and SPI1 in dataset GSE104066
GROUP	IKZF1	CD3E	SYN1	GRIN2B	SPI1
Control	2.36876	0.763813	2.28495	1.51829	2.91837
Control	2.52507	1.11205	1.85491	1.71097	2.85826
Control	3.09063	1.9543	2.54925	2.24092	3.05015
Control	2.29002	1.98321	3.14884	1.59393	3.4166
Control	2.47416	2.17193	3.39605	1.84449	3.43708
CGN	2.80815	1.11515	2.67754	1.26414	2.6514
CGN	3.92211	3.72899	3.77776	2.47697	4.41804
CGN	3.67426	1.82683	2.88723	2.63953	4.72194
CGN	4.03239	1.67017	2.44231	1.47143	3.16586
CGN	3.46335	2.62041	3.86076	2.27641	3.85342
CGN	4.349	2.91172	4.17204	2.20335	5.11629
CGN	2.71308	2.68499	2.82634	2.16017	3.75488
CGN	3.76241	3.66146	3.20003	2.90896	3.95527
CGN	3.47371	1.77929	2.28841	2.51276	3.24502
CGN	3.80224	2.09918	3.76815	1.75754	3.81073
CGN	4.40657	2.35377	2.92949	1.92411	4.03826
CGN	3.85483	2.60425	2.75639	1.7129	3.88316
CGN	3.23724	1.16775	3.56069	1.03949	2.98469
CGN	4.30997	2.56104	2.82218	1.96619	3.57343
CGN	2.76797	1.64336	3.26604	1.96552	4.33106
CGN	3.48463	2.22535	2.4139	1.67709	3.31392
CGN	2.31202	2.90612	3.8304	2.12513	3.40574
CGN	5.22076	1.94477	2.89722	2.24651	3.23929
CGN	3.07917	1.10347	3.06252	2.68633	3.16884
CGN	5.3505	5.78954	3.14119	2.69802	4.25587
CGN	4.21786	1.27256	3.23858	1.96811	3.5695
CGN	2.69863	3.82091	3.03667	1.91474	4.21537
CGN	2.07654	1.56152	3.29819	1.67915	3.49757
CGN	3.99764	1.75058	2.87081	1.61358	3.84445
CGN	3.0228	1.67529	3.6135	1.83548	4.07599
CGN	3.02458	2.27441	3.835	1.66478	4.00828
CGN	2.4729	2.28017	2.50041	1.44211	4.04945
CGN	3.77548	2.97287	3.38593	2.34094	4.10269
CGN	2.65712	2.40963	4.68573	1.84067	4.23814
CGN	3.29311	1.55238	4.49633	2.33107	4.53783
CGN	3.32333	1.23939	2.67729	2.5876	3.88783
CGN	3.27173	1.41444	2.83189	2.05394	4.72414
CGN	4.0623	1.78698	3.55887	2.08762	4.31353
CGN	3.33621	3.26618	3.03922	1.7024	3.86152
CGN	2.61169	2.48976	3.10943	1.75042	3.47048
CGN	4.51375	1.81329	2.96346	4.03038	4.97291
CGN	4.11247	1.51029	3.15449	1.64732	3.69604
CGN	4.36581	2.87982	3.56725	1.72096	4.65648
CGN	2.51241	1.46851	4.64176	2.74262	4.66563
CGN	2.52592	1.79356	3.42782	2.34828	3.70486
CGN	3.45401	1.85076	4.02553	2.01786	4.53649
CGN	2.70219	1.37346	4.83638	1.48838	3.67365
CGN	2.29974	1.48275	2.61428	1.84519	2.16607
CGN	2.24207	1.22442	3.57288	1.46702	2.43293
CGN	3.68544	1.24795	3.11138	2.40971	3.40565
CGN	3.94665	2.48528	2.7348	1.60206	3.5988
CGN	2.65326	1.5955	3.1421	1.62595	3.27361
CGN	2.95816	2.19289	3.79964	1.89029	2.97823
CGN	2.42942	1.70412	2.36334	2.3517	2.90439
CGN	4.57019	3.9943	9.051	4.26443	1.48175
CGN	4.23202	3.55669	8.42126	4.03044	1.34452
CGN	4.45952	6.48201	8.36912	3.80343	2.51891
CGN	4.77939	3.98759	8.66293	4.59626	1.79033
CGN	3.9338	5.08211	9.49505	3.1265	1.96466
CGN	4.66424	3.50282	8.67662	5.35342	1.91733
CGN	4.10895	7.1098	9.99767	4.01668	1.15988
CGN	4.60934	2.24997	8.05875	4.02012	1.198
CGN	6.00698	2.73691	8.83911	5.95923	1.50322
CGN	4.81167	3.61413	8.6729	4.26674	1.0848
CGN	5.2482	2.26226	7.15137	4.86787	2.28642
CGN	4.49616	4.40453	8.55277	3.35471	1.40504
CGN	4.59599	3.85749	8.52372	4.38163	1.30395
CGN	4.33099	4.98689	8.36931	5.07463	1.35263
CGN	4.33764	2.42019	7.66623	4.42034	1.19176
CGN	4.85061	3.84424	8.09605	5.08221	1.72558
CGN	4.59277	6.06181	8.97777	3.75826	1.44154
CGN	3.90455	3.66229	8.9365	3.9769	1.60338
CGN	4.94766	4.03231	8.49206	4.04207	1.34292
CGN	4.60775	4.86587	9.94342	4.39538	1.2602
CGN	4.15326	4.00804	8.17365	5.09194	1.8771
CGN	3.98995	1.9897	7.90756	4.26795	2.04094
